# Supplementary material
Source: Springer Nature journal article supplement (https://www.springermedizin.de/resource/supplementary/13058_2012_3185_MOESM7_ESM.pdf/9703458)

**A**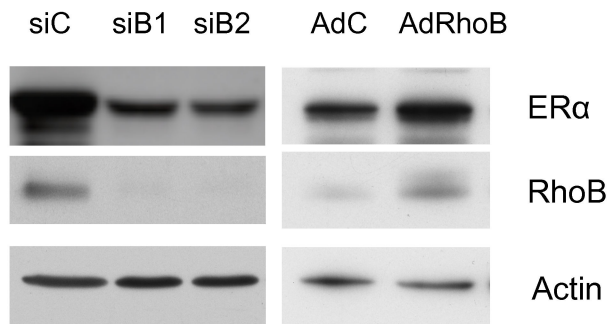**B**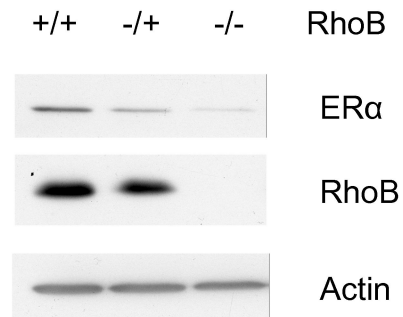**C**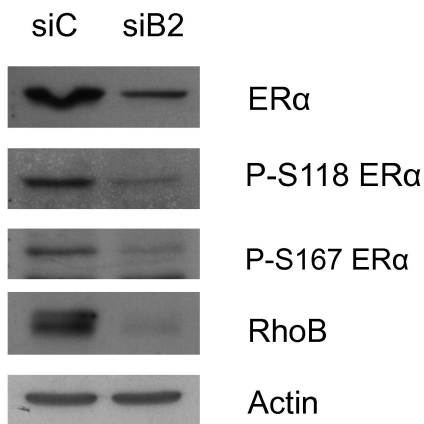**D**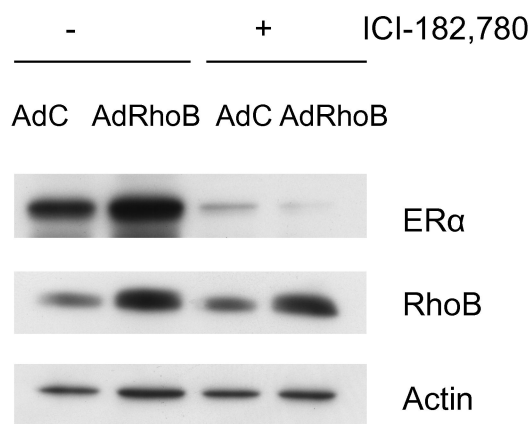

Supplement: MOESM7 [file 9703458]
